# Supplementary material for: Zinc ferrite-based p–n homojunction with multi-effect for efficient photoelectrochemical water splitting
Source: Royal Society of Chemistry journal article supplement (doi:10.1039/d0cc05514j), 2020-01-01
Supplement: d0cc05514j1.pdf [file d0cc05514j1.pdf]

## **Electronic Supplemental Information:**

### **1. Experimental Section**

#### **1.1 Preparation of ZnFe<sub>2</sub>O<sub>4</sub>**

Firstly, the F-SnO<sub>2</sub> conductive glass (FTO) was ultrasonically rinsed by CH<sub>3</sub>COCH<sub>3</sub>, (CH<sub>3</sub>)<sub>2</sub>CHOH, CH<sub>3</sub>CH<sub>2</sub>OH and deionized water, respectively. The rinsed FTO with the conductive side facing down was placed in a Teflon lined stainless steel autoclave (TLSSA). 0.15 M FeCl<sub>3</sub>·6H<sub>2</sub>O, 0.10 M Zn(NO<sub>3</sub>)<sub>2</sub>·6H<sub>2</sub>O and 0.15 M NaNO<sub>3</sub> were dissolved in 20 mL deionized water and stirred for 15 min to gain the yellow precursor solution, which was poured into the TLSSA for 6 h at 100 °C. Then, the substrate with samples was rinsed by deionized water and dried. Next, the FTO was annealed at 550 °C for 2 h. After that, the FTO was soaked in 1 M NaOH solution for 12 h to eliminate the undesirable outer-field ZnO. Finally, the pure ZnFe<sub>2</sub>O<sub>4</sub> was fabricated successfully.

#### **1.2 Preparation of pristine Ni-ZnFe<sub>2</sub>O<sub>4</sub>**

The majority of the preparation parameters of the pristine Ni-ZnFe<sub>2</sub>O<sub>4</sub> was resembled that of the ZnFe<sub>2</sub>O<sub>4</sub>. The discrepancy was that 0.04 M Ni(NO<sub>3</sub>)<sub>2</sub>·6H<sub>2</sub>O was added into the precursor solution. Other processes were retained immutable.

#### **1.3 Preparation of ZnFe<sub>2</sub>O<sub>4</sub>/Ni-ZnFe<sub>2</sub>O<sub>4</sub> p-n homojunction**

The FTO with ZnFe<sub>2</sub>O<sub>4</sub> was placed in the TLSSA. 0.15 M FeCl<sub>3</sub>·6H<sub>2</sub>O, 0.10 M Zn(NO<sub>3</sub>)<sub>2</sub>·6H<sub>2</sub>O, 0.15 M NaNO<sub>3</sub> and 0.04 M Ni(NO<sub>3</sub>)<sub>2</sub>·6H<sub>2</sub>O were dissolved in 20 mL deionized water and agitated for 15 min to acquire the precursor solution, which was decanted into the TLSSA at 100 °C for 2 h. After that, the FTO was cleaned by deionized water and dried. And then, the FTO was heat-treated at 550 °C for 2 h. After the heat-treatment, the FTO was stepped in 1 M NaOH solution for 12 h aim at purification. Finally, the ZnFe<sub>2</sub>O<sub>4</sub>/Ni-ZnFe<sub>2</sub>O<sub>4</sub> p-n homojunction was prepared.

#### **1.4 Characterizations**

The surface morphology of samples was observed by JEOL JSM-7800F scanning electron microscope (SEM). The microstructure of samples was carried out by JEOL JEM-2100 transmission electron microscopy (TEM). The crystallographic phase identification of samples was studied by X-ray diffractometer (XRD, Rigaku-D/max-2500; Cu K $\alpha$  radiation,  $\lambda=0.154059$  nm, 40 kV). The element composition of samples was measured by energy dispersive X-ray spectroscopy (EDS, AZtec from Oxford). The chemical state of samples was determined by X-ray photoelectron spectroscopy (XPS, Thermo ESCALAB 250Xi). The optical absorption property of

samples was characterized by DU-8B UV-vis double-beam spectrophotometer. The PEC performance of as-prepared samples was measured by electrochemical workstation (CHI760E), while 0.5 M Na<sub>2</sub>SO<sub>4</sub> aqueous solution without sacrificial agent (pH=7) was used as electrolyte, a standard three-electrode configuration includes working electrode (as-prepared samples), counter electrode (platinum foil) and reference electrode (Ag/AgCl electrode) illuminated with a Xenon lamp (100 mW/cm<sup>2</sup>). The electrochemical impedance spectra (EIS) of samples was performed on a three-electrode configuration, tested under illumination at a potential of 0 V vs RHE and a frequency range of 10-100 kHz. The optical band gap of samples was calculated as follows:

$$(\alpha h\nu)^n = A(h\nu - E_g) \quad (1)$$

Where  $\alpha$  was the absorption coefficient,  $h$  was the Planck's constant,  $\nu$  was the photon frequency, the  $n$  was 2 since ZnFe<sub>2</sub>O<sub>4</sub> was to a direct band gap semiconductor,  $A$  was a constant and  $E_g$  was the optical band gap.

The Mott-Schottky plot of samples was characterized in 0.5 M Na<sub>2</sub>SO<sub>4</sub> electrolyte to assess the flat band potential of samples, and p-n characteristic, the calculation process was according to the following equations:

$$n\text{-type semiconductor} : 1/C^2 = (2/e_0 \varepsilon \varepsilon_0 N_d) [(V_a - V_{fd}) - kT/e_0] \quad (2)$$

$$p\text{-type semiconductor} : 1/C^2 = (2/e_0 \varepsilon \varepsilon_0 N_A) [(-V_a + V_{fd}) - kT/e_0] \quad (3)$$

Where  $C$  was the specific capacitance,  $e_0$  was fundamental electric charge,  $\varepsilon$  was the dielectric constant,  $\varepsilon_0$  was the permittivity of vacuum,  $N_d$  was the donor density (n-type semiconductor),  $N_A$  was the acceptor density (p-type semiconductor),  $V_a$  was the applied potential,  $V_{fd}$  was the flat band potential,  $k$  was the Boltzmann constant and  $T$  was the temperature. In order to clarify the charge separate dynamics in bulk and surface, we determine the charge separation efficiency in the bulk ( $\eta_{bulk}$ ) and on the surface ( $\eta_{surface}$ ) through adding 0.1M Na<sub>2</sub>SO<sub>3</sub> hole scavenger in 0.5M Na<sub>2</sub>SO<sub>4</sub> electrolyte solution.  $\eta_{bulk}$  is calculated by the equation as following [1,2]:

$$J_{H_2O} = J_{abs} \times \eta_{bulk} \times \eta_{surface} \quad (4)$$

Where  $J_{H_2O}$  was the photocurrent density measured without Na<sub>2</sub>SO<sub>3</sub> (just Na<sub>2</sub>SO<sub>4</sub> aqueous solution, 0.5M) at 1.23 V vs. RHE,  $J_{abs}$  was the photocurrent density generated when all photons absorbed by samples were converted into electrons and holes, the  $J_{abs}$  values of ZnFe<sub>2</sub>O<sub>4</sub>, Ni-ZnFe<sub>2</sub>O<sub>4</sub> and ZnFe<sub>2</sub>O<sub>4</sub>/Ni-ZnFe<sub>2</sub>O<sub>4</sub> were calculated as 4.27 mA/cm<sup>2</sup>, 4.37 mA/cm<sup>2</sup> and 4.31 mA/cm<sup>2</sup> according to the references of [3] and [4], respectively. With adding 0.1M Na<sub>2</sub>SO<sub>3</sub> as the electrolyte,

the oxidation kinetics of the system is very rapid so that fundamentally suppresses the surface recombination of charge carriers without influencing the bulk charge separation, thus,  $\eta_{surface}$  could be regarded as 100%. Therefore, the photocurrent density in the presence of  $\text{Na}_2\text{SO}_3$  is calculated as following:

$$J_{H_2O} = J_{abs} \times \eta_{bulk} \quad (5)$$

As a consequence, the charge separation efficiency of samples was obtained according to the following equations:

$$\eta_{bulk} = J_{Na_2SO_3}/J_{abs} \times 100\% \quad (6)$$

$$\eta_{surface} = J_{H_2O}/J_{Na_2SO_3} \times 100\% \quad (7)$$

$J_{Na_2SO_3}$  was the photocurrent density measured with  $\text{Na}_2\text{SO}_3$  photo-oxidation ( $\text{Na}_2\text{SO}_4/\text{Na}_2\text{SO}_3$  aqueous solution, 0.5M/0.1M). The measured data for calculating the bulk and surface charge separation efficiency was shown in Fig.S8. The Ag/AgCl potential was transformed to the reversible hydrogen electrode (RHE) potential according to the following formula:

$$E_{RHE} = E_{Ag/AgCl} + 0.059pH + 0.1976 \quad (8)$$

## References:

- [1] K. H. Ye, Z. Wang, J. Gu, S. Xiao, Y. Yuan, Y. Zhu, Y. Zhang, W. Mai, S. Yang, *Energy Environ. Sci.*, 2017, 10, 772-779.
- [2] H. Dotan, K. Sivula, M. Grätzel, A. Rothschild, S. C. Warren, *Energy Environ. Sci.*, 2011, 4, 958-964.
- [3] J. H. Kim, J. H. Kim, J. W. Jang, J. Y. Kim, S. H. Choi, G. Magesh, J. Lee, J. S. Lee, *Adv. Energy Mater.*, 2015, 5, 1401933.
- [4] H. W. Jeong, T. H. Jeon, J. S. Jang, W. Choi, H. Park, *J. Phys. Chem. C*, 2013, 117, 9104-9112.

List of Figures:

Fig.S1 Synthetic route schematic diagram of ZnFe<sub>2</sub>O<sub>4</sub>/Ni-ZnFe<sub>2</sub>O<sub>4</sub> p-n homojunction

Fig.S2 Cross-view SEM images of ZnFe<sub>2</sub>O<sub>4</sub> (a), Ni-ZnFe<sub>2</sub>O<sub>4</sub> (b), ZnFe<sub>2</sub>O<sub>4</sub>/Ni-ZnFe<sub>2</sub>O<sub>4</sub>

Fig.S3 Element distribution mapping of ZnFe<sub>2</sub>O<sub>4</sub>/Ni-ZnFe<sub>2</sub>O<sub>4</sub> p-n homojunction

Fig.S4 XRD patterns of samples

Fig.S5 TEM image (a) and HRTEM image (b) of ZnFe<sub>2</sub>O<sub>4</sub>/Ni-ZnFe<sub>2</sub>O<sub>4</sub> core-shell p-n homojunction

Fig.S6 XPS valence band spectra (a) and Valence/Conduction Band sketch map (b) of samples

Fig.S7 Mott-Schottky plots of ZnFe<sub>2</sub>O<sub>4</sub> (a) and Ni-ZnFe<sub>2</sub>O<sub>4</sub> (b)

Fig.S8 The J-V curves of ZnFe<sub>2</sub>O<sub>4</sub>, Ni-ZnFe<sub>2</sub>O<sub>4</sub> and ZnFe<sub>2</sub>O<sub>4</sub>/Ni-ZnFe<sub>2</sub>O<sub>4</sub> with/without Na<sub>2</sub>SO<sub>3</sub>

Fig.S9 Equivalent circuit model (a) and related parameters of electrochemical impedance spectra (b) of samples

Fig.S10 Charge transfer mechanism diagram of ZnFe<sub>2</sub>O<sub>4</sub>/Ni-ZnFe<sub>2</sub>O<sub>4</sub> core-shell p-n homojunction

Fig.S11 Brief diagram of p-n junction: (a) single semiconductor, (b) forming p-n junction, (c) charge transfer of p-n junction under illumination

Tab.S1 Summary of XPS data about Zn 2p, Fe 2p, O 1s, Ni 2p and C 1s of ZnFe<sub>2</sub>O<sub>4</sub>/Ni-ZnFe<sub>2</sub>O<sub>4</sub>

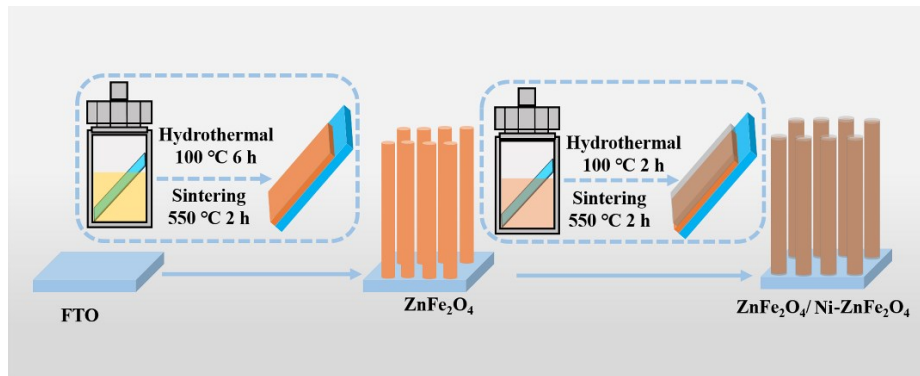

Fig.S1 Synthetic route schematic diagram of ZnFe<sub>2</sub>O<sub>4</sub>/Ni-ZnFe<sub>2</sub>O<sub>4</sub> p-n homojunction

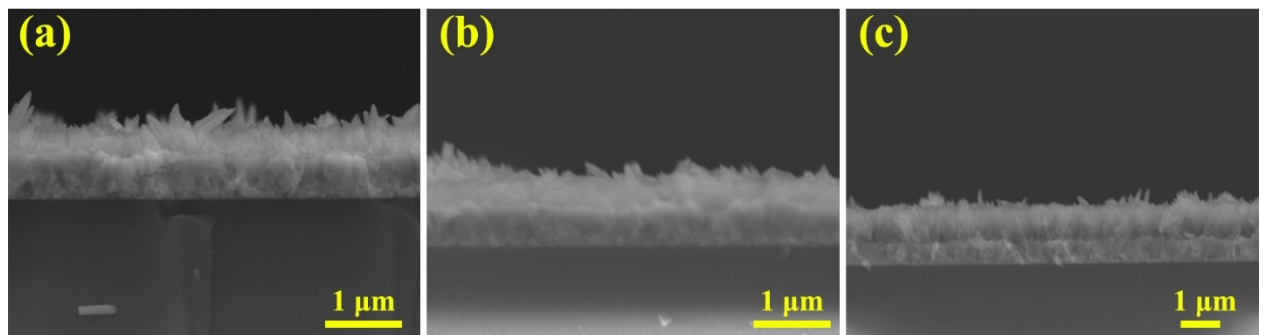

Fig.S2 Cross-view SEM images of ZnFe<sub>2</sub>O<sub>4</sub> (a), Ni-ZnFe<sub>2</sub>O<sub>4</sub> (b), ZnFe<sub>2</sub>O<sub>4</sub>/Ni-ZnFe<sub>2</sub>O<sub>4</sub>

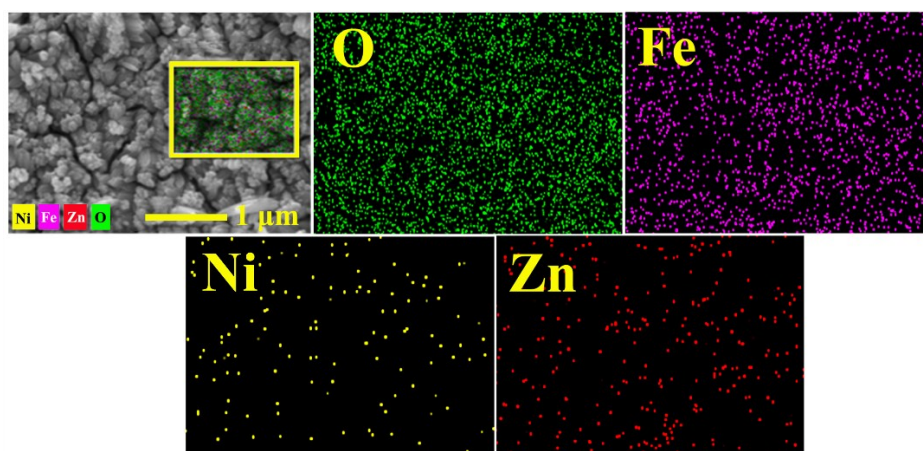

Fig.S3 Element distribution mapping of  $\text{ZnFe}_2\text{O}_4/\text{Ni-ZnFe}_2\text{O}_4$  p-n homojunction

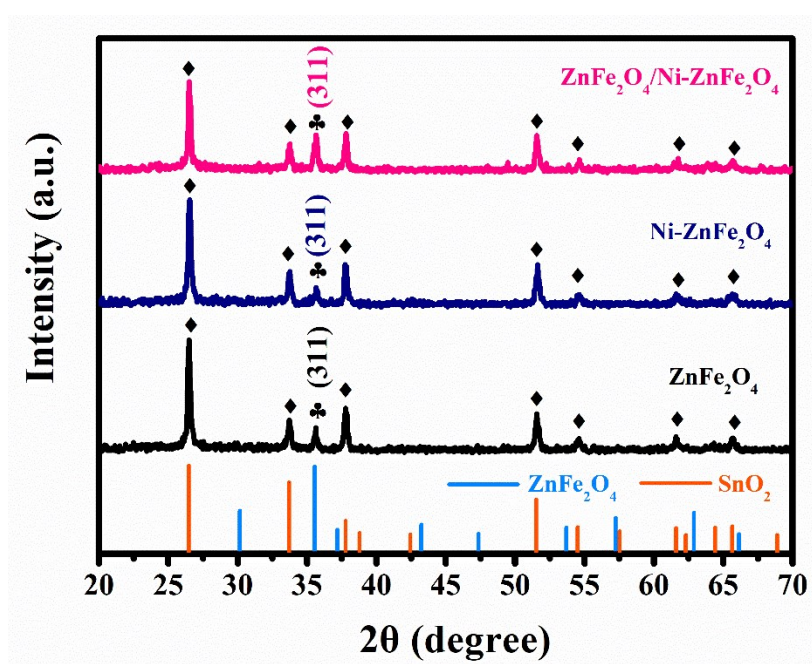

Fig.S4 XRD patterns of samples

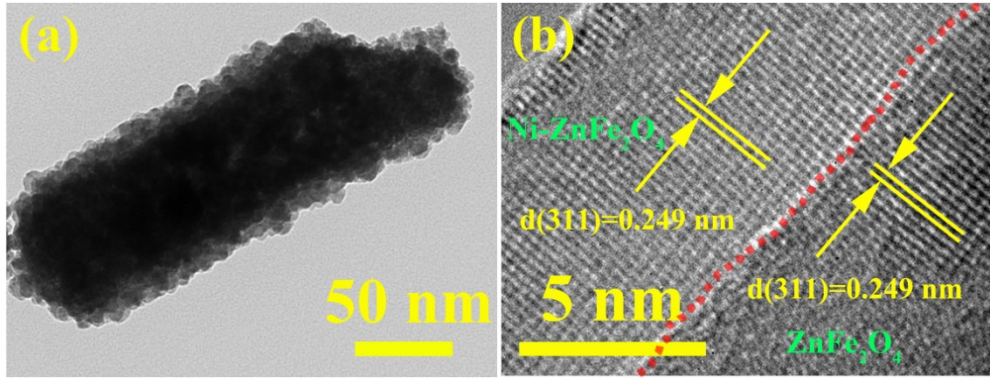

Fig.S5 TEM image (a) and HRTEM image (b) of  $\text{ZnFe}_2\text{O}_4/\text{Ni-ZnFe}_2\text{O}_4$  core-shell p-n homojunction

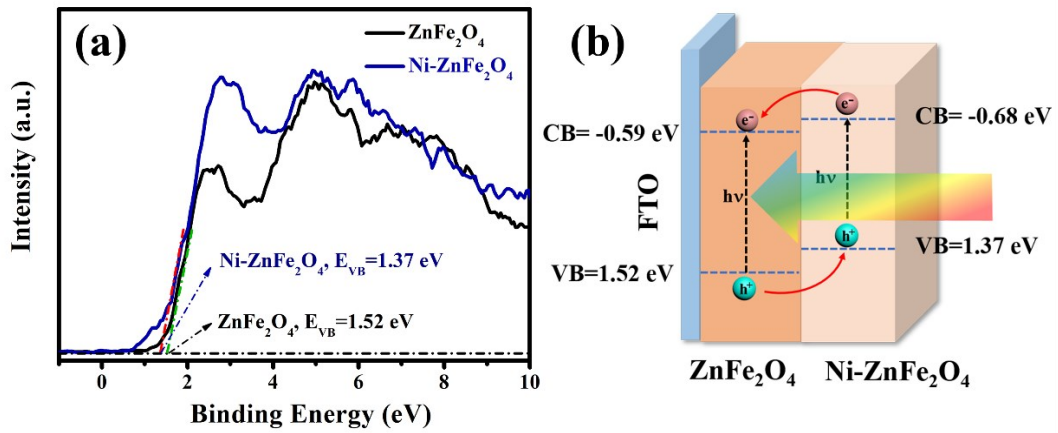

Fig.S6 XPS valence band spectra (a) and Valence/Conduction Band sketch map (b) of samples

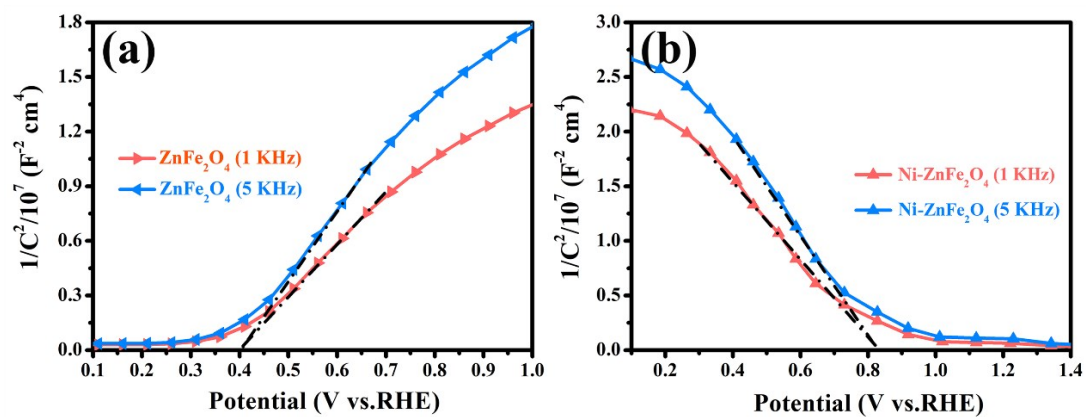

Fig.S7 Mott-Schottky plots of  $\text{ZnFe}_2\text{O}_4$  (a) and  $\text{Ni-ZnFe}_2\text{O}_4$  (b)

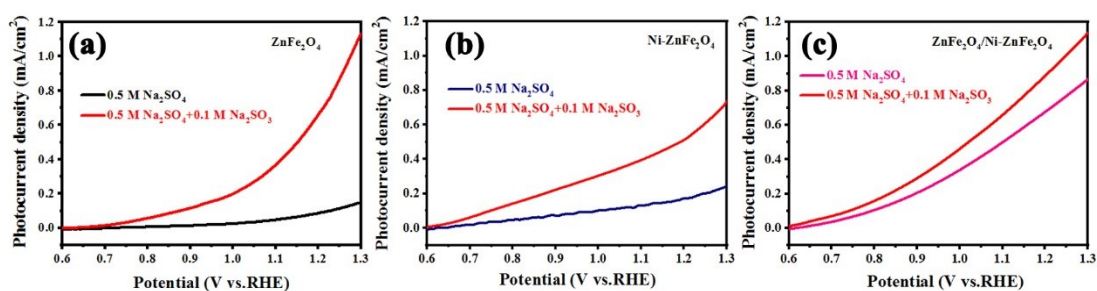

Fig. S8 The J-V curves of  $\text{ZnFe}_2\text{O}_4$ ,  $\text{Ni-ZnFe}_2\text{O}_4$  and  $\text{ZnFe}_2\text{O}_4/\text{Ni-ZnFe}_2\text{O}_4$  with/without  $\text{Na}_2\text{SO}_3$



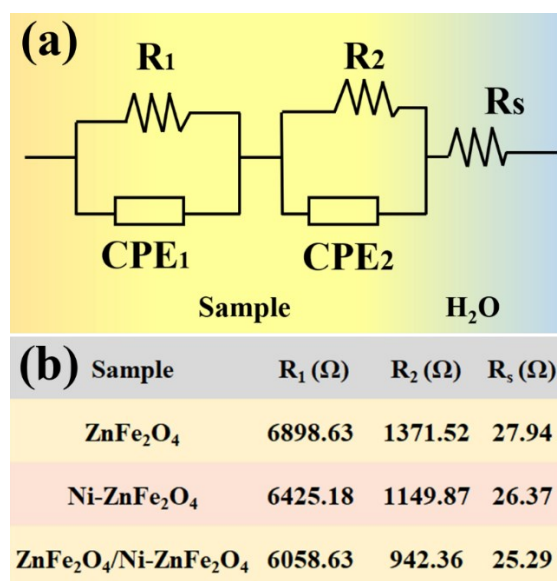

Fig.S9 Equivalent circuit model (a) and related parameters of electrochemical impedance spectra (b) of samples

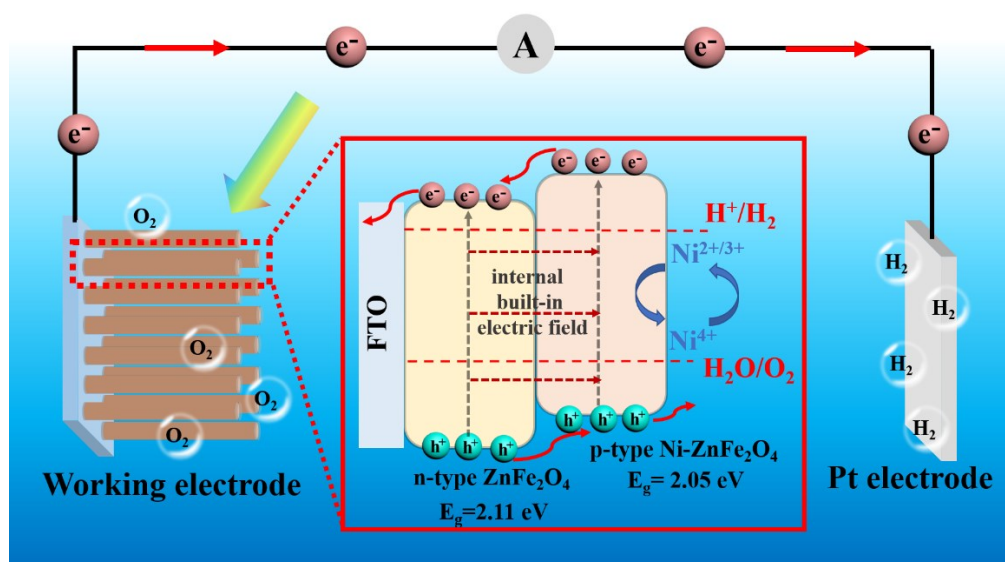

Fig.S10 Charge transfer mechanism diagram of ZnFe<sub>2</sub>O<sub>4</sub>/Ni-ZnFe<sub>2</sub>O<sub>4</sub> core-shell p-n homojunction

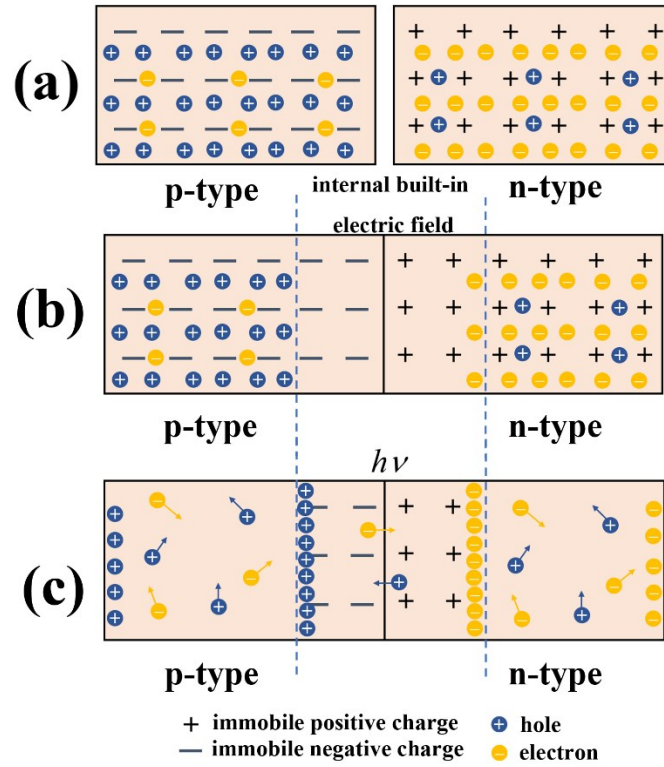

Fig.S11 Brief diagram of p-n junction: (a) single semiconductor, (b) forming p-n junction, (c) charge transfer of p-n junction under illumination

Tab.S1 Summary of XPS data about Zn 2p, Fe 2p, O 1s, Ni 2p and C 1s of  
ZnFe<sub>2</sub>O<sub>4</sub>/Ni-ZnFe<sub>2</sub>O<sub>4</sub>

| Name  | Atomic % | Start BE | End BE  | Peak BE | Peak Type |
|-------|----------|----------|---------|---------|-----------|
| Zn 2p | 11.63    | 1059.15  | 1008.62 | 1022.7  | Standard  |
| Fe 2p | 23.26    | 747.01   | 697.29  | 710.8   | Standard  |
| O 1s  | 46.52    | 540.23   | 524.85  | 529.8   | Standard  |
| Ni 2p | 1.97     | 891.81   | 840.75  | 855.6   | Standard  |
| C 1s  | 16.62    | 296.37   | 281.61  | 284.7   | Standard  |
